# Supplementary material
Source: PubMed Central journal article supplement (PMC4710481)
Supplement: NIHMS716595-supplement-2.pdf [file NIHMS716595-supplement-2.pdf]

| Name in Z-Brain Database  | # of fish | References/Notes                                                                                                                                                                                                 |
|---------------------------|-----------|------------------------------------------------------------------------------------------------------------------------------------------------------------------------------------------------------------------|
| -6.7FRhcrtr-Gal4-uasKaede | 12        | Tg(-6.7FRhcrtr:Gal4): Lacoste et al., (2015) Current Biology, 1–10. doi:10.1016/j.cub.2015.04.025, Tg(Uas:Kaede) Scott et al., (2007) Nature Methods. doi:10.1038/nmeth1033                                      |
| Anti-5HT                  | 40        | Sigma S5545, used 1:100                                                                                                                                                                                          |
| Anti-Gad67                | 17        | Stains Gad65 + Gad67, Millipore ab11070, used 1:100                                                                                                                                                              |
| Anti-GlyR                 | 160       | Synaptic Systems mAb4a, used 1:100, <a href="http://www.sysy.com/products/glycrec/facts-146011.php">http://www.sysy.com/products/glycrec/facts-146011.php</a>                                                    |
| Anti-TH                   | 10        | Millipore AB152, used 1:500                                                                                                                                                                                      |
| Anti-Zn12(Hnk-1)          | 9         | ZIRC antibody collection, used 1:500, <a href="http://zfin.org/ZDB-ATB-081002-12">http://zfin.org/ZDB-ATB-081002-12</a>                                                                                          |
| Anti-Zn1                  | 10        | ZIRC antibody collection, used 1:1000, <a href="http://zfin.org/ZDB-ATB-081002-9">http://zfin.org/ZDB-ATB-081002-9</a>                                                                                           |
| Anti-Znp1(Synaptotagmin2) | 118       | Developmental Studies Hybridoma Bank, used 1:200, <a href="http://dshb.biology.uiowa.edu/motor-neuron-axons">http://dshb.biology.uiowa.edu/motor-neuron-axons</a>                                                |
| Anti-Zrf1(GFAP)           | 5         | ZIRC antibody collection, used 1:1000, <a href="http://zfin.org/ZDB-ATB-081002-46">http://zfin.org/ZDB-ATB-081002-46</a>                                                                                         |
| Anti-Zrf2                 | 5         | ZIRC antibody collection, used 1:500, <a href="http://zfin.org/ZDB-ATB-081002-47">http://zfin.org/ZDB-ATB-081002-47</a>                                                                                          |
| Anti-tERK                 | 193       | ZIRC antibody collection, used 1:500, Cell Signalling #4696, <a href="http://www.cellsignal.com/product/productDetail.jsp?productId=4696">http://www.cellsignal.com/product/productDetail.jsp?productId=4696</a> |
| Elavl3-GCaMP5G            | 7         | Tg(Elavl3:GCaMP5G): Ahrens et al., (2013) Nature Methods, 10(5), 413–420. doi:10.1038/nmeth.2434                                                                                                                 |
| Elavl3-H2BRFP             | 10        | Tg(Elavl3-H2B-RFP): Created by Clemens Riegler                                                                                                                                                                   |
| EtVmat2-GFP               | 55        | Et(Vmat2:GFP): Wen et al., (2008) Developmental Biology, 314(1), 84–92. doi:10.1016/j.ydbio.2007.11.012                                                                                                          |
| Gad1b-GFP                 | 10        | Tg(Gad1b:GFP): Satou et al., (2013) Development, 140(18), 3927–3931. doi:10.1242/dev.099531                                                                                                                      |
| Glyt2-GFP                 | 13        | Tg(Glyt2:GFP): McLean et al., (2007) Nature, 446(7131), 71–75. doi:10.1038/nature05588                                                                                                                           |
| Hcrt-RFP                  | 15        | Tg(Hcrt:mRFP): Liu et al., (2015) Development. doi:10.1242/dev.117424                                                                                                                                            |
| Isl1-GFP                  | 17        | Tg(Isl1:GFP): Higashijima et al., (2000). The Journal of Neuroscience 20(1), 206–218.                                                                                                                            |
| Isl2bGal4-uasDendra       | 8         | Tg(Isl2b:Gal4): Fredj et al., (2010) The Journal of Neuroscience 30(32), 10939–10951. doi:10.1523/JNEUROSCI.1556-10.2010                                                                                         |
| Olig2-GFP                 | 12        | Tg(Olig2:GFP): Shin et al., (2003) Methods in Cell Science, 25(1-2), 7–14. doi:10.1023/B:MICS.0000006847.09037.3a                                                                                                |
| Otpb.A-Nsfb-GFP           | 10        | Tg(otpb.A:nfsB-egfp)zc77: Lambert et al., (2012) The Journal of Neuroscience, 32(39), 13488–13500. doi:10.1523/JNEUROSCI.1638-12.2012                                                                            |
| Otpb.A-Gal4-UAS-GCaMP     | 19        | Tg(UAS:GCaMP5G): was created by Adam Douglass and Jared Wortzman, Tg(otpb:Gal4-VP16)zc57: Fujimoto et al., (2011) Developmental Biology, 352(2), 393–404. doi:10.1016/j.ydbio.2011.01.023                        |
| Oxtl-GFP                  | 68        | Tg(Oxtl:GFP): Coffey et al., (2013) PLoS ONE, 8(1), e53991. doi:10.1371/journal.pone.0053991.s007                                                                                                                |
| Pet1-GFP                  | 13        | Tg(Pet1:GFP): Lilleaar et al., (2009) The Journal of Comparative Neurology, 512(2), 158–182. doi:10.1002/cne.21887                                                                                               |
| Ptf1aGal4-uasKaede        | 11        | Tg(Ptf1a:Gal4): Parsons et al., (2009). Mechanisms of Development, 126(10), 898–912. doi:10.1016/j.mod.2009.07.002, Tg(Uas:Kaede) Scott et al., (2007) Nature Methods. doi:10.1038/nmeth1033                     |
| Qrfp-GFP                  | 15        | Tg(Qrfp:GFP): Liu et al., (2015) Development. doi:10.1242/dev.117424                                                                                                                                             |
| S1181tGal4-uasKaede       | 14        | Et(fos:Gal4-VP16)s1181t: Scott and Baier (2009). Frontiers in Neural Circuits, 3, 13. doi:10.3389/neuro.04.013.2009, Tg(Uas:Kaede) Scott et al., (2007) Nature Methods. doi:10.1038/nmeth1033                    |
| SpinalBackfills           | 23        | Kimmel et al., (1982) The Journal of Comparative Neurology, 205(2), 112–127. doi:10.1002/cne.902050203                                                                                                           |
| Vglut2a-GFP               | 15        | Tg(Vglut2a:GFP): Bae et al., (2009) Developmental Biology, 330(2), 406–426. doi:10.1016/j.ydbio.2009.04.013                                                                                                      |

**Supplementary Table 1:** Information about the anatomical labels contained in the Z-Brain.
